# Supplementary material for: Trends from the surveillance of suicidal behaviour by the Belgian Network of Sentinel General Practices over two decades: a retrospective observational study
Source: HighWire-hosted journal article supplement (doi:10.1136/bmjopen-2015-008584), 2015-11-01
Supplement: bmjopen-2015-008584supp_table1.pdf [file bmjopen-2015-008584supp_table1.pdf]

**Supplementary table 1** Trends in the characteristics of suicidal events, suicides and suicide attempts reported by the SGP over four time periods

|                              |         | 2011-2      |           | 2007-8    |             | 2000-1  |             | 1993-5    |             | All       |             | p <sup>a</sup> |
|------------------------------|---------|-------------|-----------|-----------|-------------|---------|-------------|-----------|-------------|-----------|-------------|----------------|
| All suicidal events          |         |             |           |           |             |         |             |           |             |           |             |                |
|                              |         | N=288       |           | N=328     |             | N=437   |             | N=618     |             | N=1671    |             |                |
|                              |         | n/N         |           | %(95% CI) |             | n/N     |             | %(95% CI) |             | n/N       |             |                |
| Men                          | 129/288 | 44.8        |           | 129/321   | 40.2        | 171/436 | 39.2        | 233/616   | 37.8        | 662/1661  | 39.9        | 0.058          |
|                              |         | (39.0-50.7) |           |           | (34.8-45.8) |         | (34.6-44.0) |           | (34.0-41.8) |           | (37.5-42.2) |                |
| Age < 65 years               | 245/285 | 86.0        |           | 282/326   | 86.5        | 382/429 | 89.0        | 544/606   | 89.8        | 1453/1646 | 88.3        | 0.053          |
|                              |         | (81.4-90.0) |           |           | (82.3-90.0) |         | (85.7-91.8) |           | (87.1-92.1) |           | (86.6-89.8) |                |
| Violent method               | 112/286 | 39.2        |           | 109/326   | 33.4        | 151/437 | 34.6        | 181/608   | 29.8        | 553/1657  | 33.4        | 0.009          |
|                              |         | (33.5-45.1) |           |           | (28.3-38.8) |         | (30.1-39.2) |           | (26.2-33.6) |           | (31.1-35.7) |                |
| Patient was new <sup>b</sup> | 16/288  | 5.6         |           | No data   |             | 71/437  | 16.3        | 29/393    | 7.4         | 116/1118  | 10.4        | 0.344          |
|                              |         | (3.2-8.9)   |           |           |             |         | (12.9-20.0) |           | (5.0-10.4)  |           | (8.6-12.3)  |                |
| GP was first caregiver       | 78/288  | 27.1        |           | 128/292   | 43.8        | 242/399 | 60.7        | 414/581   | 71.3        | 862/1560  | 55.3        | <0.001         |
|                              |         | (22.0-32.6) |           |           | (38.1-49.7) |         | (55.7-65.5) |           | (67.4-74.9) |           | (52.7-57.7) |                |
| Survival                     | 220/279 | 78.9        |           | 268/319   | 84.0        | 333/403 | 82.6        | 466/561   | 83.1        | 1287/1562 | 82.4        | 0.273          |
|                              |         |             |           |           |             |         |             |           |             |           |             |                |
| Suicides                     |         |             |           |           |             |         |             |           |             |           |             |                |
|                              |         | N=59        |           | N=51      |             | N=70    |             | N=95      |             | N=275     |             |                |
|                              |         | n/N         | %(95% CI) | n/N       | %(95% CI)   | n/N     | n/N         | %(95% CI) | n/N         | %(95% CI) | n/N         |                |
|                              |         | CI)         |           |           |             |         |             |           |             |           |             |                |
| Men                          | 42/59   | 71.2        |           | 36/50     | 72.0        | 53/70   | 75.7        | 62/95     | 65.3        | 193/274   | 70.4        | 0.449          |
|                              |         | (58.0-82.2) |           |           | (57.5-83.8) |         | (64.0-85.2) |           | (54.8-74.7) |           | (64.7-75.8) |                |
| Age < 65 years               | 43/59   | 72.9        |           | 36/51     | 70.6        | 53/69   | 76.8        | 76/94     | 80.9        | 208/273   | 76.2        | 0.169          |
|                              |         | (59.7-83.6) |           |           | (56.2-82.5) |         | (65.1-86.1) |           | (71.4-88.2) |           | (70.7-81.1) |                |
| Violent method               | 45/59   | 76.3        |           | 38/51     | 74.5        | 53/70   | 75.7        | 71/92     | 77.2        | 207/272   | 76.1        | 0.843          |
|                              |         | (63.4-86.4) |           |           | (60.4-85.7) |         | (64.0-85.7) |           | (67.2-85.3) |           | (70.6-81.0) |                |
| Patient was new <sup>b</sup> | 6/59    | 10.2        |           | No data   |             | 16/70   | 22.9        | 7/64      | 10.9        | 29/193    | 15.0        | 0.890          |
|                              |         | (3.8-20.8)  |           |           |             |         | (13.7-34.4) |           | (4.5-21.2)  |           | (10.3-20.9) |                |
| GP was first caregiver       | 13/59   | 22.0        |           | 13/27     | 48.2        | 28/47   | 59.6        | 49/75     | 65.3        | 103/208   | 49.5        | <0.001         |
|                              |         | (12.3-34.7) |           |           | (28.7-68.0) |         | (44.3-73.6) |           | (53.5-76.0) |           | (42.5-56.5) |                |
| Suicide attempts             |         |             |           |           |             |         |             |           |             |           |             |                |
|                              |         | N=220       |           | N=268     |             | N=333   |             | N=466     |             | N=1287    |             |                |
|                              |         | n/N         | %(95% CI) | n/N       | %(95% CI)   | n/N     | %(95% CI)   | n/N       | %(95% CI)   | n/N       | %(95% CI°)  |                |

|                              |         |                     |         |                     |         |                     |         |                     |           |                     |        |
|------------------------------|---------|---------------------|---------|---------------------|---------|---------------------|---------|---------------------|-----------|---------------------|--------|
| Men                          | 86/220  | 39.1<br>(32.6-45.9) | 91/264  | 34.5<br>(28.8-40.5) | 109/333 | 32.7<br>(27.7-38.0) | 153/464 | 33.0<br>(28.7-37.5) | 439/1281  | 34.3<br>(31.7-36.9) | 0.139  |
| Age < 65 years               | 196/219 | 89.5<br>(84.7-93.2) | 238/267 | 89.1<br>(84.8-92.6) | 300/329 | 91.2<br>(87.6-94.0) | 424/463 | 91.6<br>(88.7-93.9) | 1158/1278 | 90.6<br>(88.9-92.2) | 0.249  |
| Violent method               | 63/218  | 28.9<br>(23.0-35.4) | 66/266  | 24.8<br>(19.7-30.5) | 90/333  | 27.0<br>(22.3-32.1) | 97/461  | 21.0<br>(17.4-25.1) | 316/1278  | 24.7<br>(22.4-27.2) | <0.05  |
| Patient was new <sup>b</sup> | 5/220   | 2.3<br>(1.0-5.2)    | No data |                     | 37/333  | 11.1<br>(7.9-15.0)  | 15/305  | 4.9<br>(2.8-8.0)    | 57/858    | 6.6<br>(5.1-8.5)    | 0.119  |
| GP was first caregiver       | 62/220  | 28.2<br>(22.3-34.6) | 111/256 | 43.4<br>(37.2-49.7) | 192/321 | 59.8<br>(54.2-65.2) | 325/454 | 71.6<br>(67.2-75.7) | 690/1251  | 55.2<br>(52.4-57.9) | <0.001 |

Missing values [n/N(%)]:gender: 10/1671(0.6%); age: 25/1671(1.5%); suicide methods (Violent method versus nonviolent ): 14/1671(0.8%); GP was first caregiver: 111/1671(6.6%); patient was new: 0/1118(0.0%); survival: 109/1671(6.5%).

<sup>a</sup> Significance of score test for trend of odds

<sup>b</sup> The score test for trend of odds was calculated using data from the first and the fourth period. In 1993-4 (no data are available for 1995) the SGP reported whether the patient was new; in 2000-1 the SGP reported only whether the patient was seen during out-of-hours care; in 2011-2 the SGP reported whether “the patient was new/seen during out-of-hours care”
