# Supplementary material for: Trends from the surveillance of suicidal behaviour by the Belgian Network of Sentinel General Practices over two decades: a retrospective observational study
Source: HighWire-hosted journal article supplement (doi:10.1136/bmjopen-2015-008584), 2015-11-01
Supplement: bmjopen-2015-008584supp_table2.pdf [file bmjopen-2015-008584supp_table2.pdf]

**Supplementary table 2 Characteristics of suicidal events with missing data exceeding 1%**

|                                                       | Age missing   |                | First caregiver missing |                | Survival missing |                |
|-------------------------------------------------------|---------------|----------------|-------------------------|----------------|------------------|----------------|
|                                                       | n/N(%)        | p <sup>a</sup> | n/N(%)                  | p <sup>a</sup> | n/N(%)           | p <sup>a</sup> |
| Gender                                                |               |                |                         |                |                  |                |
| Men                                                   | 18/999(1.8%)  | 0.134          | 43/999(4.3%)            | <0.001         | 30/662(4.5%)     | <0.05          |
| Women                                                 | 6/662(0.9%)   |                | 66/662(10.0%)           |                | 76/999(7.6%)     |                |
| Age                                                   |               |                |                         |                |                  |                |
| < 65                                                  |               |                | 93/1453(6.4%)           | 0.128          | 87/1453(6.0%)    | 0.302          |
| ≥ 65                                                  |               |                | 19/193(9.3%)            |                | 8/193(4.2%)      |                |
| Violent methods                                       |               |                |                         |                |                  |                |
| No                                                    | 17/1104(1.5%) | 0.883          | 40/1104(3.6%)           | <0.001         | 77/1104(7.0%)    | 0.226          |
| Yes                                                   | 8/553(1.5%)   |                | 69/553(12.5%)           |                | 30/553(5.4%)     |                |
| GP was first caregiver                                |               |                |                         |                |                  |                |
| No                                                    | 6/698(0.9%)   | < 0.05         |                         |                | 32/698(4.6%)     | <0.05          |
| Yes                                                   | 19/862(2.2%)  |                |                         |                | 69/862(8.0%)     |                |
| Patient was new                                       |               |                |                         |                |                  |                |
| No                                                    | 5/636(0.8%)   | < 0.05         | 19/636(3.0%)            | 0.585          | 21/636(3.3%)     | <0.001         |
| Yes                                                   | 2/45(4.4%)    |                | 2/45(4.4%)              |                | 12/45(26.7%)     |                |
| Suicide                                               |               |                |                         |                |                  |                |
| No                                                    | 9/1287(0.7%)  | 0.960          | 36/1287(2.8%)           | <0.001         |                  |                |
| Yes                                                   | 2/275(0.7%)   |                | 67/275(24.4%)           |                |                  |                |
| Deceased upon arrival GP                              |               |                |                         |                |                  |                |
| No                                                    | 3/44(6.8%)    | < 0.05         | 4/44(9.1%)              | <0.001         |                  |                |
| Yes                                                   | 1/171(0.6%)   |                | 55/171(32.2%)           |                |                  |                |
| Total                                                 | 25/1671(1.5%) |                | 111/1671(6.6%)          |                | 109/1671(6.5%)   |                |
| <sup>a</sup> Value of significance test by chi square |               |                |                         |                |                  |                |
